# Supplementary material
Source: PubMed Central journal article supplement (PMC2781706)

## **Electrophilic affibodies forming covalent bonds to protein targets.**

### **SUPPLEMENTAL DATA**

#### **SUPPLEMENTAL FIGURE LEGENDS**

Supplemental Fig. 1. Testing EBA coupling to Affibody D36C. We analyzed Affibody D36C modification by SDS-PAGE and Coomassie staining, with or without oxidation via  $\text{CuCl}_2$ . In lane 1 Affibody D36C was not modified and not oxidized. In all other lanes, samples were oxidized. In lane 2 Affibody D36C was unmodified, in lane 3 reacted with EBA followed by IAA, and in lane 4 with IAA alone or lane 5 with EBA alone. IAA is more reactive at cysteine modification than EBA and is a positive control. Bands corresponding to Affibody D36C monomer or an Affibody D36C disulfide-bonded homodimer are marked. Resistance to copper-induced disulfide formation indicates that the cysteine has been labeled by EBA or IAA.

Supplemental Fig. 2. Analysis of affibody modification and interaction with ZSPA by mass spectrometry. *A.* Spectrum of Affibody D36C after reaction with EBA. *B.* Spectrum of the negative control for covalent Affibody:ZSPA interaction, where Affibody D36C was labeled with IAA instead of EBA, before incubating with ZSPA N6C.

### Supplemental Figure 1

CuCl<sub>2</sub> - + + + +  
 EBA - - + - +  
 IAA - - + + -

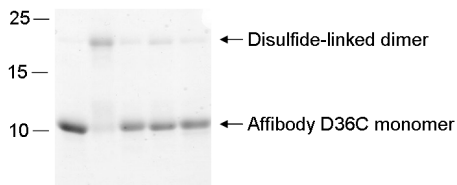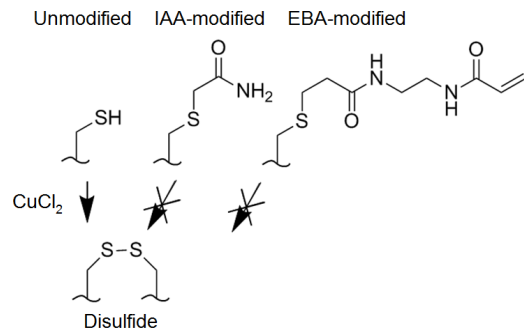

### Supplemental Figure 2

**A**

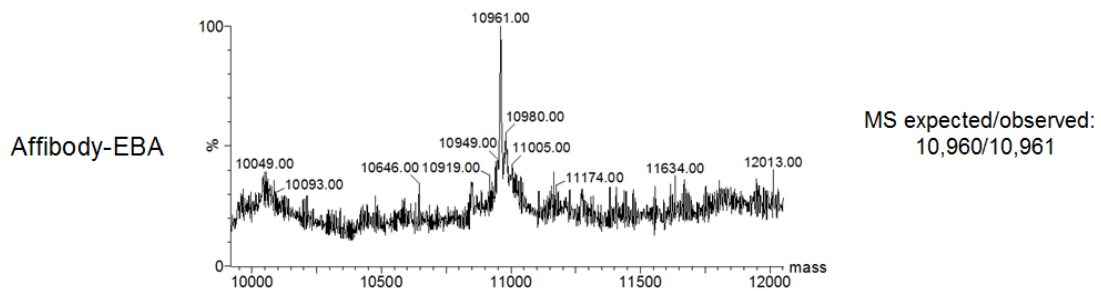

**B**

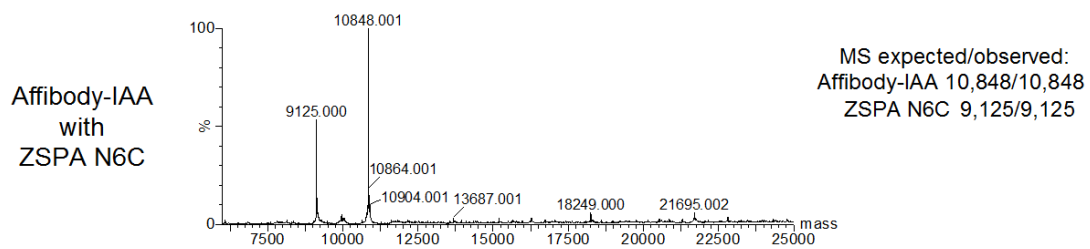

Supplement: supp_M109.034322_Suppdata.pdf [file supp_M109.034322_Suppdata.pdf]
